# Supplementary material for: Equipping Future Climate and Health Advocates: Piloting a Locally Focused Health Effects of Climate Change Curriculum in Providence County Schools
Source: Research Square preprint supplement (doi:10.21203/rs.3.rs-6606535/v1), 2025-06-02
Supplement: Supplementary file 1 [file 59963b543dd83b6d0ac3135f.docx]

**Equipping Future Climate and Health Advocates: Piloting a Locally Focused Health Effects of Climate Change Curriculum in Providence County Schools**

Samantha A. Lee, M.M.Sc.,1-3 Daniella D. Maydan, M.S.P.H.,4 Panagis Galiatsatos, M.D., M.H.S.,4 Melissa Golden, D.O., M.P.H.,4 Joanna Brown, M.D., M.P.H.5,6

**1Department of Medical Science, Brown University Graduate School, Providence, Rhode Island, USA.**

**2Massachusetts Institute for Excellence and Quality in Learning Health Systems (Mass EQLHS), Boston, MA, USA.**

**3Center for Learning Health Care Delivery, Beth Israel Deaconess Medical Center, Boston, MA, USA.**

**4Johns Hopkins School of Medicine, Baltimore, Maryland, USA.**

**5Department of Family Medicine, Brown University, Warren Alpert School of Medicine, Providence, RI, USA.**

**6Division of Adolescent/Young Adult Medicine, Boston Children’s Hospital, Boston, MA, USA.**

**Corresponding Author:** Samantha A. Lee; [slee82@bidmc.harvard.edu](mailto:slee82@bidmc.harvard.edu); 20 Overland St. Boston, MA 02215 United States

**Supplementary Material: Teacher Pre-survey**

- **ID code** [fill in the blank]
- **School** [fill in the blank]
- **Grade** 3rd, 4th, 5th, 6th, 7th, 8th, 9th, 10th, 11th, 12th

|  | **1-strongly disagree** | **2-disagree** | **3-neutral** | **4-agree** | **5-strongly agree** |
| --- | --- | --- | --- | --- | --- |
| I am confident discussing climate change with my students |  |  |  |  |  |
| My students believe the environmental effects of climate change are severe |  |  |  |  |  |
| My students believe the health effects of climate change are severe |  |  |  |  |  |
| My students believe climate change negatively impacts their health |  |  |  |  |  |
| My students believe climate change will negatively impact their health in the future |  |  |  |  |  |
| My students believe humans can stop the progression of climate change |  |  |  |  |  |
| My students believe humans can prevent and/or treat the health effects of climate change |  |  |  |  |  |
| My students believe they can help stop the progression of climate change |  |  |  |  |  |
| My students believe they can prevent and/or treat the health effects of climate change |  |  |  |  |  |

- **What barriers do you believe get in the way of your students engaging in actions to help slow down the progression of climate change (e.g. energy conservation, recycling, advocacy)?**
  - Lack of understanding or knowledge about climate change science
  - Limited financial resources
  - Limited time
  - Lack of motivation
  - Lack of interest
  - Not a priority for them
  - Other
- **What barriers do you believe get in the way of your students protecting themselves against climate change-related impacts on health (heat-illness, asthma and allergy exacerbations, etc)?**
  - Lack of understanding or knowledge about climate change science
  - Limited financial resources
  - Limited time
  - Lack of motivation
  - Lack of interest
  - Not a priority for them
  - Other

|  | **1-strongly disagree** | **2-disagree** | **3-neutral** | **4-agree** | **5-strongly agree** |
| --- | --- | --- | --- | --- | --- |
| My students trust health care professionals |  |  |  |  |  |

**Supplementary Material: Teacher Post-survey**

- **ID code** [fill in the blank]
- **School** [fill in the blank]
- **Grade** 3rd, 4th, 5th, 6th, 7th, 8th, 9th, 10th, 11th, 12th

|  | **1-strongly disagree** | **2-disagree** | **3-neutral** | **4-agree** | **5-strongly agree** |
| --- | --- | --- | --- | --- | --- |
| I have a greater understanding of the science of climate change and its health effects after these lessons |  |  |  |  |  |
| I have a greater understanding of how to prevent and treat the health effects of climate change after this curriculum |  |  |  |  |  |
| I am confident discussing climate change with my students |  |  |  |  |  |
| My students have a greater understanding of the science of climate change and its health effects after this curriculum |  |  |  |  |  |
| My students have a greater understanding of how to prevent and treat the health effects of climate change after this curriculum |  |  |  |  |  |
| My students have a greater understanding of environmental justice and health equity after this curriculum |  |  |  |  |  |
| My students have a greater awareness of climate initiatives in my community after this curriculum |  |  |  |  |  |
| My students believe the environmental effects of climate change are severe |  |  |  |  |  |
| My students believe the health effects of climate change are severe |  |  |  |  |  |
| My students believe climate change negatively impacts their health |  |  |  |  |  |
| My students believe climate change will negatively impact their health in the future |  |  |  |  |  |
| My students believe humans can stop the progression of climate change |  |  |  |  |  |
| My students believe humans can prevent and/or treat the health effects of climate change |  |  |  |  |  |
| My students believe they can help stop the progression of climate change |  |  |  |  |  |
| My students believe they can prevent and/or treat the health effects of climate change |  |  |  |  |  |

- **What barriers do you believe get in the way of your students engaging in actions to help slow down the progression of climate change (e.g. energy conservation, recycling, advocacy)?**
  - Lack of understanding or knowledge about climate change science
  - Limited financial resources
  - Limited time
  - Lack of motivation
  - Lack of interest
  - Not a priority for them
  - Other
- **What barriers do you believe get in the way of your students protecting themselves against climate change-related impacts on health (heat-illness, asthma and allergy exacerbations, etc)?**
  - Lack of understanding or knowledge about climate change science
  - Limited financial resources
  - Limited time
  - Lack of motivation
  - Lack of interest
  - Not a priority for them
  - Other

|  | **1-strongly disagree** | **2-disagree** | **3-neutral** | **4-agree** | **5-strongly agree** |
| --- | --- | --- | --- | --- | --- |
| My students trust health care professionals |  |  |  |  |  |
| My students will share the information they learned from these lessons with others |  |  |  |  |  |
| My students will change their behaviors based on what they learned from these lessons |  |  |  |  |  |

- **What were your favorite things about the curriculum?** [fill in the blank]
- **What were your least favorite things about the curriculum?** [fill in the blank]
- **How did you feel about the instructors? Please include their name if you remember it.** [fill in the blank]
- **I want LHAP to come back to teach more health education.** Strongly disagree, disagree, neutral, agree, strongly agree
- **If you have any additional feedback, or questions, please leave them here.**
