# Supplementary material for: Equipping Future Climate and Health Advocates: Piloting a Locally Focused Health Effects of Climate Change Curriculum in Providence County Schools
Source: Research Square preprint supplement (doi:10.21203/rs.3.rs-6606535/v1), 2025-06-02
Supplement: Supplementary file 2 [file d35941c023867df91f0a2c72.docx]

**Equipping Future Climate and Health Advocates: Piloting a Locally Focused Health Effects of Climate Change Curriculum in Providence County Schools**

Samantha A. Lee, M.M.Sc.,1-3 Daniella D. Maydan, M.S.P.H.,4 Panagis Galiatsatos, M.D., M.H.S.,4 Melissa Golden, D.O., M.P.H.,4 Joanna Brown, M.D., M.P.H.5,6

**1Department of Medical Science, Brown University Graduate School, Providence, Rhode Island, USA.**

**2Massachusetts Institute for Excellence and Quality in Learning Health Systems (Mass EQLHS), Boston, MA, USA.**

**3Center for Learning Health Care Delivery, Beth Israel Deaconess Medical Center, Boston, MA, USA.**

**4Johns Hopkins School of Medicine, Baltimore, Maryland, USA.**

**5Department of Family Medicine, Brown University, Warren Alpert School of Medicine, Providence, RI, USA.**

**6Division of Adolescent/Young Adult Medicine, Boston Children’s Hospital, Boston, MA, USA.**

**Corresponding Author:** Samantha A. Lee; [slee82@bidmc.harvard.edu](mailto:slee82@bidmc.harvard.edu); 20 Overland St. Boston, MA 02215 United States

**Supplementary Material: Student Pre-survey**

- **ID code** [fill in the blank]
- **School** [fill in the blank]
- **Grade** 3rd, 4th, 5th, 6th, 7th, 8th, 9th, 10th, 11th, 12th

|  | **1-strongly disagree** | **2-disagree** | **3-neutral** | **4-agree** | **5-strongly agree** |
| --- | --- | --- | --- | --- | --- |
| The environmental effects of climate change are severe |  |  |  |  |  |
| The health effects of climate change are severe |  |  |  |  |  |
| Climate change negatively impacts my health |  |  |  |  |  |
| Climate change will negatively impact my health in the future |  |  |  |  |  |
| **Climate Anxiety Scale1** | **Rarely** | **Never** | **Sometimes** | **Often** | **Almost always** |
| Thinking about climate change makes it difficult for me to sleep or concentrate |  |  |  |  |  |
| I find myself crying because of climate change |  |  |  |  |  |
| My concerns about climate change make it hard for me to have fun with my family or friends |  |  |  |  |  |
| My concerns about climate change interfere with my ability to get work or school assignments done |  |  |  |  |  |
|  | **1-strongly disagree** | **2-disagree** | **3-neutral** | **4-agree** | **5-strongly agree** |
| Humans can stop the progression of climate change |  |  |  |  |  |
| Humans can prevent and/or treat the health effects of climate change |  |  |  |  |  |
| I can help stop the progression of climate change |  |  |  |  |  |
| I can prevent and/or treat the health effects of climate change |  |  |  |  |  |

- **What barriers get in the way of you engaging in actions to help slow down the progression of climate change (e.g. energy conservation, recycling, advocacy)?**
- Lack of understanding or knowledge about climate change science
- Limited financial resources
- Limited time
- Lack of motivation
- Lack of interest
- Not a priority for me
- Other
- **What barriers get in the way of you protecting yourself against climate change-related impacts on health (heat-illness, asthma and allergy exacerbations, etc)?**
- Lack of understanding or knowledge about climate change science
- Limited financial resources
- Limited time
- Lack of motivation
- Lack of interest
- Not a priority for me
- Other

|  | **1-strongly disagree** | **2-disagree** | **3-neutral** | **4-agree** | **5-strongly agree** |
| --- | --- | --- | --- | --- | --- |
| I trust health care professionals |  |  |  |  |  |

**Supplementary Material: Student Post-survey**

- **ID code** [fill in the blank]
- **School** [fill in the blank]
- **Grade** 3rd, 4th, 5th, 6th, 7th, 8th, 9th, 10th, 11th, 12th

|  | **1-strongly disagree** | **2-disagree** | **3-neutral** | **4-agree** | | **5-strongly agree** |
| --- | --- | --- | --- | --- | --- | --- |
| I have a greater understanding of the science of climate change and its health effects after these lessons |  |  |  |  | |  |
| I have a greater understanding of how to prevent and treat the health effects of climate change after these lessons |  |  |  |  | |  |
| I have a greater understanding of environmental justice and health equity after these lessons |  |  |  |  | |  |
| I have a greater awareness of climate initiatives in my community after these lessons |  |  |  |  | |  |
| The environmental effects of climate change are severe |  |  |  |  | |  |
| The health effects of climate change are severe |  |  |  |  | |  |
| Climate change negatively impacts my health |  |  |  |  | |  |
| Climate change will negatively impact my health in the future |  |  |  |  | |  |
| **Climate Anxiety Scale1** | **Rarely** | **Never** | **Sometimes** | **Often** | | **Almost always** |
| Thinking about climate change makes it difficult for me to sleep or concentrate |  |  |  |  | |  |
| I find myself crying because of climate change |  |  |  |  | |  |
| My concerns about climate change make it hard for me to have fun with my family or friends |  |  |  |  | |  |
| My concerns about climate change interfere with my ability to get work or school assignments done |  |  |  |  | |  |
|  | **1-strongly disagree** | **2-disagree** | **3-neutral** | **4-agree** | **5-strongly agree** | |
| Humans can stop the progression of climate change |  |  |  |  |  | |
| Humans can prevent and/or treat the health effects of climate change |  |  |  |  |  | |
| I can help stop the progression of climate change |  |  |  |  |  | |
| I can prevent and/or treat the health effects of climate change |  |  |  |  |  | |

- **What barriers get in the way of you engaging in actions to help slow down the progression of climate change (e.g. energy conservation, recycling, advocacy)?**
- Lack of understanding or knowledge about climate change science
- Limited financial resources
- Limited time
- Lack of motivation
- Lack of interest
- Not a priority for me
- Other
- **What barriers get in the way of you protecting yourself against climate change-related impacts on health (heat-illness, asthma and allergy exacerbations, etc)?**
- Lack of understanding or knowledge about climate change science
- Limited financial resources
- Limited time
- Lack of motivation
- Lack of interest
- Not a priority for me
- Other

|  | **1-strongly disagree** | **2-disagree** | **3-neutral** | **4-agree** | **5-strongly agree** |
| --- | --- | --- | --- | --- | --- |
| I trust health care professionals |  |  |  |  |  |
| I will share the information I learned from these lessons with others |  |  |  |  |  |
| I will change my behaviors based on what I learned from these lessons |  |  |  |  |  |
| I liked the climate change lessons |  |  |  |  |  |

- **What were your favorite things about the lessons?** [fill in the blank]
- **What were your least favorite things about the lessons?** [fill in the blank]
- **How did you feel about your instructors? Please include their name if you remember it.** [fill in the blank]
- **Would you want LHAP to come back to teach more health education?** Yes, No
- **If you have any additional feedback, or questions, please leave them here.** [fill in the blank]

**Works Cited**

1. Wu J, Long D, Hafez N, Maloney J, Lim Y, Samji H. Development and validation of a youth climate anxiety scale for the Youth Development Instrument survey [published online ahead of print, 2023 Aug 21]. Int J Ment Health Nurs. 2023;10.1111/inm.13201. doi:10.1111/inm.13201
